# Supplementary material for: Single-atom Cu anchored on Mo2C boosts nitrite electroreduction to ammonia
Source: Royal Society of Chemistry journal article supplement (doi:10.1039/d3cc03993e), 2023-01-01
Supplement: d3cc03993e1.pdf [file d3cc03993e1.pdf]

# Supporting Information

## Single-atom Cu Anchored on Mo<sub>2</sub>C Boosts Nitrite Electroreduction to Ammonia

Guohui Wang<sup>1</sup>, Ruiyuan Ma<sup>2</sup>, Nana Zhang<sup>1</sup>, Yali Guo<sup>1</sup>, Ke Chu<sup>1\*</sup>

<sup>1</sup>*School of Materials Science and Engineering, Lanzhou Jiaotong University, Lanzhou 730070, China*

<sup>2</sup>*School of Architecture and Urban Planning, Lanzhou Jiaotong University, Lanzhou 730070, China*

**17 January 2024**

**Note added after first publication:** This Supplementary Information file replaces that originally published on 01 November 2023. An incorrect SEM image was originally included in Fig. S14(b) in error. The correct image has been included in this updated version. The discussion and conclusions of the paper are not affected.

## Experimental Section

### *Materials*

Na<sub>2</sub>SO<sub>4</sub> (≥99.0%), NaNO<sub>2</sub> (≥99.0%), C<sub>5</sub>FeN<sub>6</sub>Na<sub>2</sub>O (≥99.0%), NH<sub>4</sub>Cl (≥99.5%), N<sub>2</sub>H<sub>4</sub> (≥99.0%), C<sub>7</sub>H<sub>5</sub>NaO<sub>3</sub> (≥99%), NaClO (5%), C<sub>6</sub>H<sub>5</sub>O<sub>7</sub>Na<sub>3</sub> (≥98%), NaOH (≥96%), (NH<sub>4</sub>)<sub>6</sub>Mo<sub>7</sub>O<sub>24</sub> (≥99.5%), C<sub>4</sub>H<sub>6</sub>N<sub>2</sub> (≥98%), Zn(NO<sub>3</sub>)<sub>2</sub>·6H<sub>2</sub>O (≥99.0%), Cu(NO<sub>3</sub>)<sub>2</sub>·3H<sub>2</sub>O (≥99.99%), H<sub>2</sub>SO<sub>4</sub> (≥99.0%), H<sub>2</sub>O<sub>2</sub> (≥99.0%), HCl (≥99.0%), C<sub>2</sub>H<sub>5</sub>OH (≥99.0%) and Nafion (5 wt.%) were provided from Sigma-Aldrich Chemical Reagent Co., Ltd. and Sinopharm Chemical Reagent Co., Ltd. Carbon cloth was purchased from Hengqiu Technology Co., Ltd. Ar (≥99.999%) was purchased from Lanzhou Xinwanke, Co., Ltd. All the reagents were analytical grade without further purification.

### *Synthesis of Mo<sub>2</sub>C and Cu<sub>1</sub>/Mo<sub>2</sub>C nanosheets*

Two solutions were prepared: solution 1 was prepared by dissolving 4 g (NH<sub>4</sub>)<sub>6</sub>Mo<sub>7</sub>O<sub>24</sub> and 2.6 g C<sub>4</sub>H<sub>6</sub>N<sub>2</sub> in 80 ml of deionized water under stirring for 4 h, and solution 2 was prepared by dissolving 1.2 g Zn(NO<sub>3</sub>)<sub>2</sub>·6H<sub>2</sub>O in 40 ml of deionized water under stirring for 10 min. Then two solutions are mixed, stirred for 4 h to obtain a white precipitate. The obtained precipitates were collected by centrifugation, washed with deionized water and ethanol several times, and vacuum-dried at 80°C overnight. Afterwards, the white precipitates were transferred into a tube furnace and annealed at 850°C in a flowing Ar atmosphere for 1 h, obtaining Mo<sub>2</sub>C. To prepare Cu<sub>1</sub>/Mo<sub>2</sub>C, an impregnation solution was prepared by dissolving 0.04 g Cu(NO<sub>3</sub>)<sub>2</sub>·3H<sub>2</sub>O in 50 mL deionized water. Mo<sub>2</sub>C powder was then dipped into the impregnation solution for 2 h and then taken out and dried at 80 °C, obtaining Cu<sub>1</sub>/Mo<sub>2</sub>C.

### *Characterization*

X-ray diffraction (XRD) pattern was recorded on a Rigaku D/max 2400 diffractometer. Scanning electron microscopy (SEM) was carried out on a ZEISS GeminiSEM-500 microscope. Transmission electron microscopy (TEM), high-resolution transmission electron microscopy (HRTEM) were carried out on a

Tecnai G<sup>2</sup> F20 microscope. Synchrotron radiation-based X-ray absorption spectroscopy (XAS) measurements were conducted at the BL14W1 beamline in Shanghai Synchrotron Radiation Facility (SSRF).

### ***Electrochemical measurements***

Electrochemical measurements were performed on a CHI-660E electrochemical workstation with a standard three-electrode system, where catalyst coated on carbon cloth (CC, 0.5 mg cm<sup>-2</sup>) was used as working electrode, graphite rod as counter electrode and Ag/AgCl as reference electrode. All potentials were referenced to reversible hydrogen electrode (RHE) according to the equation:  $E$  (V vs. RHE) =  $E$  (V vs. Ag/AgCl) + 0.198 V + 0.059 × pH. The NO<sub>2</sub>RR measurements were carried out in 0.5 M Na<sub>2</sub>SO<sub>4</sub> + 0.1 M NaNO<sub>2</sub> electrolyte using an H-type two-compartment electrochemical cell separated by a Nafion 211 membrane. The Nafion membranes were pretreated by boiling in 5% H<sub>2</sub>O<sub>2</sub> solution for 1 h, in 0.5 M H<sub>2</sub>SO<sub>4</sub> for 1 h and in deionized water for 1 h. Prior to NO<sub>2</sub>RR electrolysis, the cathodic compartment was purged with Ar for 30 min. After each chronoamperometry test for 1 h, the produced NH<sub>3</sub> and other possible by-products (NO<sub>2</sub><sup>-</sup> and N<sub>2</sub>H<sub>4</sub>) were analyzed by various colorimetric methods using UV-vis absorbance spectrophotometer (MAPADA P5), while the gas products were analyzed by gas chromatography (Shimadzu GC2010).

### ***Determination of NH<sub>3</sub>***

The NH<sub>3</sub> concentration was determined by the indophenol blue method[1]. Firstly, the diluted sample solution (2 mL) was sequentially added to 2 mL of 1 M NaOH coloring solution containing 5% salicylic acid and 5% sodium citrate, 1 mL oxidizing solution of NaClO (4.5%) and 0.2 mL catalyst solution of C<sub>5</sub>FeN<sub>6</sub>Na<sub>2</sub>O (1 wt%). After standing in the dark for 2 h at room temperature, the absorbance values of NH<sub>3</sub> concentrations were expressed as absorption peaks at 655 nm and the concentration-absorbance curves were calibrated with different concentrations of standard NH<sub>4</sub>Cl solutions.

NH<sub>3</sub> yield rate was calculated by the following equation:

$$\text{NH}_3 \text{ yield rate } (\mu\text{mol h}^{-1} \text{ cm}^{-2}) = \frac{c_{\text{NH}_3} \times V}{t \times A} \quad (1)$$

NH<sub>3</sub>-Faradaic efficiency (FE<sub>NH<sub>3</sub></sub>) was calculated by the following equation:

$$\text{FE}_{\text{NH}_3}(\%) = \frac{6 \times F \times c_{\text{NH}_3} \times V}{M \times Q} \times 100\% \quad (2)$$

where  $c_{\text{NH}_3}$  is the measured NH<sub>3</sub> concentration,  $V$  (mL) is the volume of the electrolyte,  $t$  (h) is the reduction time and  $A$  (cm<sup>2</sup>) is the mass loading of the catalyst on CC (1 × 1 cm<sup>2</sup>).  $M$  molar mass of NH<sub>3</sub>,  $F$  (96500 C mol<sup>-1</sup>) is the Faraday constant, and  $Q$  (C) is the quantity of applied electricity.

#### ***Determination of N<sub>2</sub>H<sub>4</sub>***

The concentration of N<sub>2</sub>H<sub>4</sub> was determined by Watt and Chrisp method[2]. Coloring solution was prepared by mixing 300 mL C<sub>2</sub>H<sub>5</sub>OH, 5.99 g C<sub>9</sub>H<sub>11</sub>NO and 30 mL HCl. Then, 5 mL color solution was added into 5 mL electrolyte. After the incubation for 20 min at room temperature, the mixed solution was subjected to UV-vis measurement using the absorbance at 455 nm wavelength. The concentration-absorbance curves were calibrated by the standard N<sub>2</sub>H<sub>4</sub> solution with a series of concentrations.

#### ***Nuclear magnetic resonance (NMR) measurement***

<sup>1</sup>H nuclear magnetic resonance (NMR) measurement was performed to confirm the source of generated NH<sub>3</sub>. After chronoamperometry tests in Ar-saturated 0.1 M NaOH with 0.1 M <sup>15</sup>NO<sub>2</sub><sup>-</sup> at -0.6 V for 1 h, 4 mL of electrolyte was removed from the electrochemical reaction vessel, which was concentrated to 1 mL and further acidized to pH 2. The obtained electrolyte was mixed with 0.1 mL of deuterium oxide (D<sub>2</sub>O) containing 100 ppm of dimethyl sulphoxide (DMSO) and 70 μL of D<sub>2</sub>O for NMR spectroscopy measurement (500 MHz Bruker superconducting-magnet NMR spectrometer).

#### ***Calculation details***

DFT calculations were carried out using a Cambridge sequential total energy package (CASTEP). The generalized gradient approximation (GGA) with the Perdew–Burke–Ernzerhof (PBE) exchange-correlation function was utilized in the

calculations. The DFT-D correction method was considered for van der Waals forces. During the geometry optimization, the convergence tolerance was set to be  $1.0 \times 10^{-5}$  eV for energy and  $0.02 \text{ eV \AA}^{-1}$  for force. The  $2 \times 2 \times 1$  Monkhorst-Pack mesh was used in Brillouin zone sampling. The electron wave functions were expanded using plane waves with a cutoff energy of 400 eV.  $\text{Mo}_2\text{C}$  (001) was modeled by a  $5 \times 5$  supercell, and a vacuum region of  $15 \text{ \AA}$  was used to separate adjacent slabs.[3]

The Gibbs free energy ( $\Delta G$ , 298 K) of reaction steps is calculated by[4]:

$$\Delta G = \Delta E + \Delta ZPE - T\Delta S \quad (3)$$

where  $\Delta E$  is the adsorption energy,  $\Delta ZPE$  is the zero-point energy difference and  $T\Delta S$  is the entropy difference between the gas phase and adsorbed state. The entropies of free gases were acquired from the NIST database.

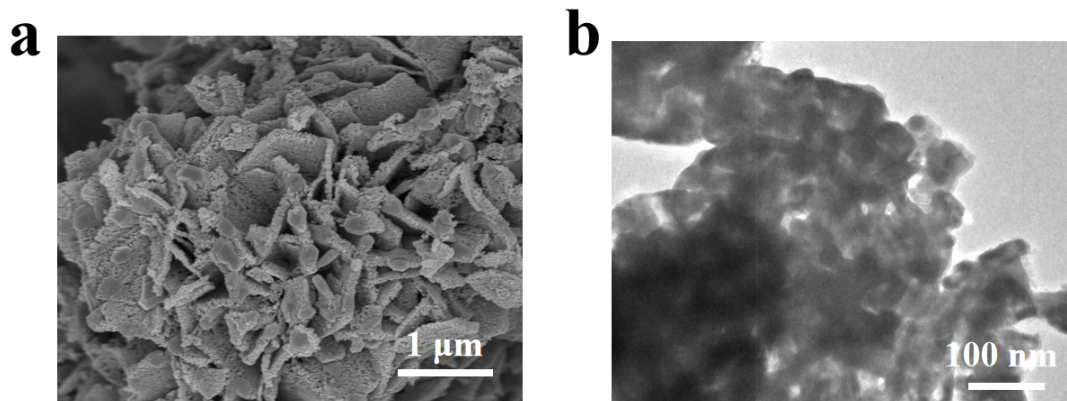

Fig. S1. Characterizations of pristine  $\text{Mo}_2\text{C}$ : (a) SEM image, (b) TEM image.

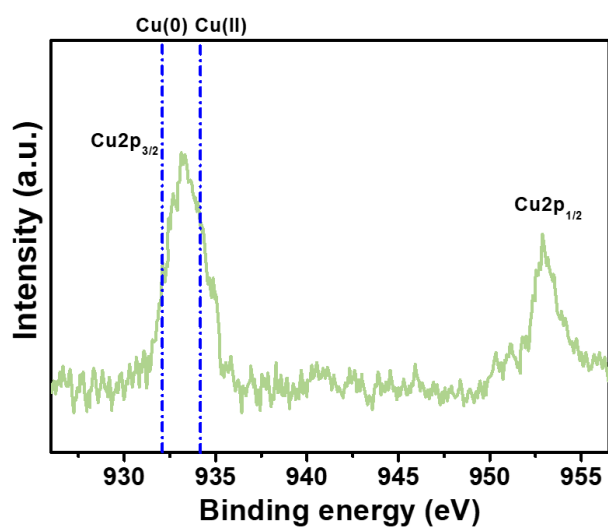

Fig. S2. XPS Cu 2p spectra of Cu<sub>1</sub>/Mo<sub>2</sub>C.

The XPS Cu 2p spectrum of Cu<sub>1</sub>/Mo<sub>2</sub>C indicates that the valence state of Cu is between +0 and +2, consistent with the XAS result.

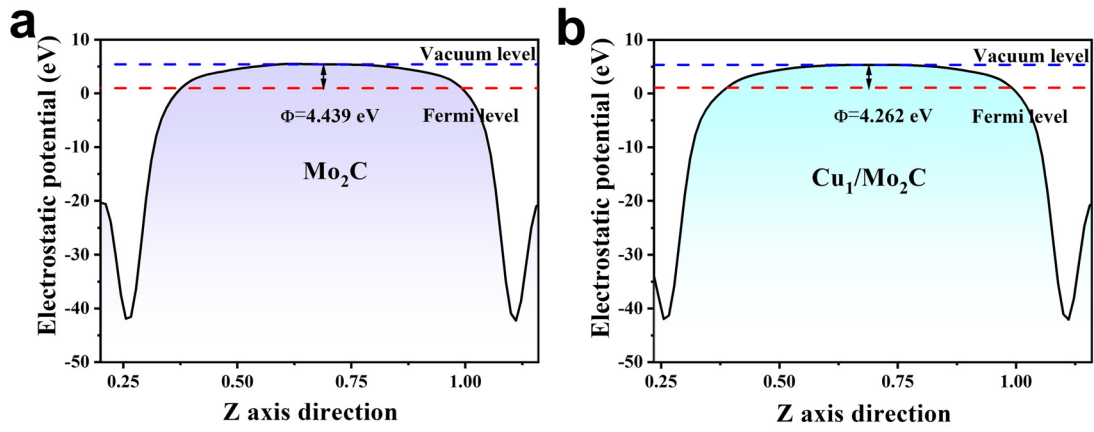

Fig. S3. Calculated work functions of Mo<sub>2</sub>C and Cu<sub>1</sub>/Mo<sub>2</sub>C.



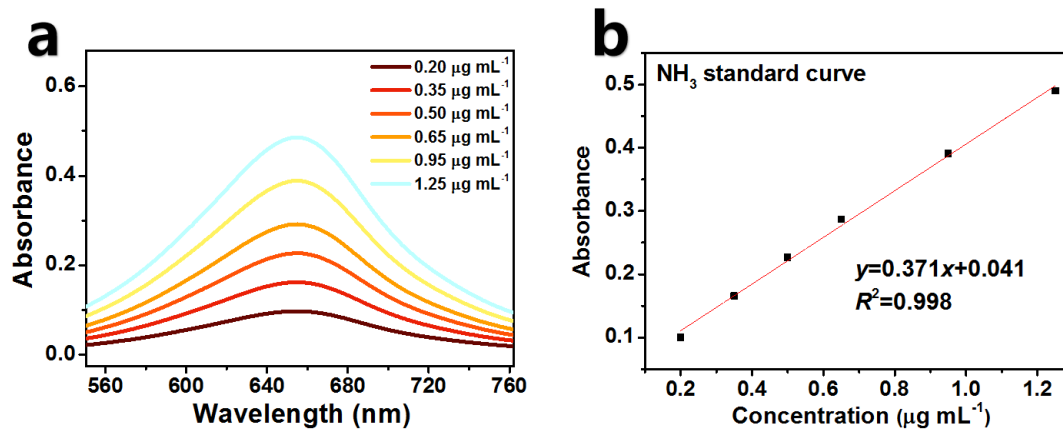

Fig. S4. (a) UV-vis absorption spectra of  $\text{NH}_4^+$  assays after incubated for 2 h at ambient conditions. (b) Calibration curve used for the calculation of  $\text{NH}_3$  concentrations.

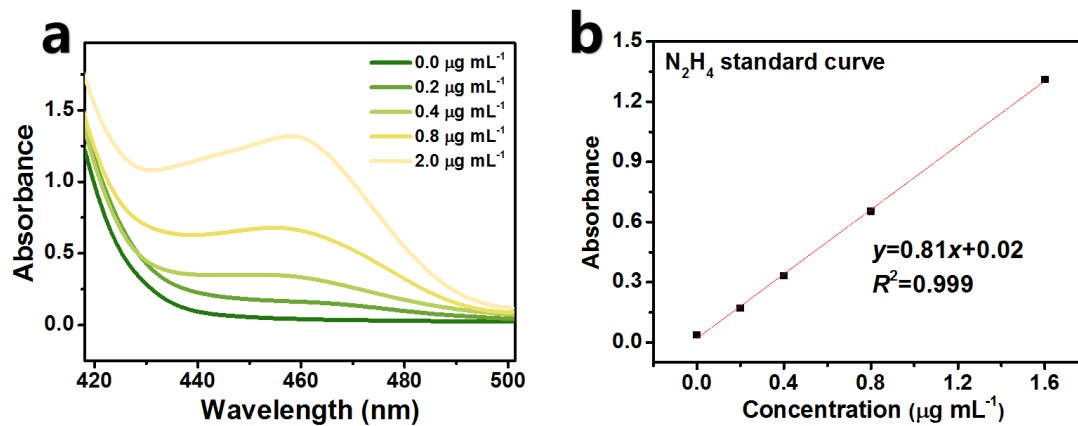

Fig. S5. (a) UV-vis absorption spectra of  $N_2H_4$  assays after incubated for 20 min at ambient conditions. (b) Calibration curve used for calculation of  $N_2H_4$  concentrations.

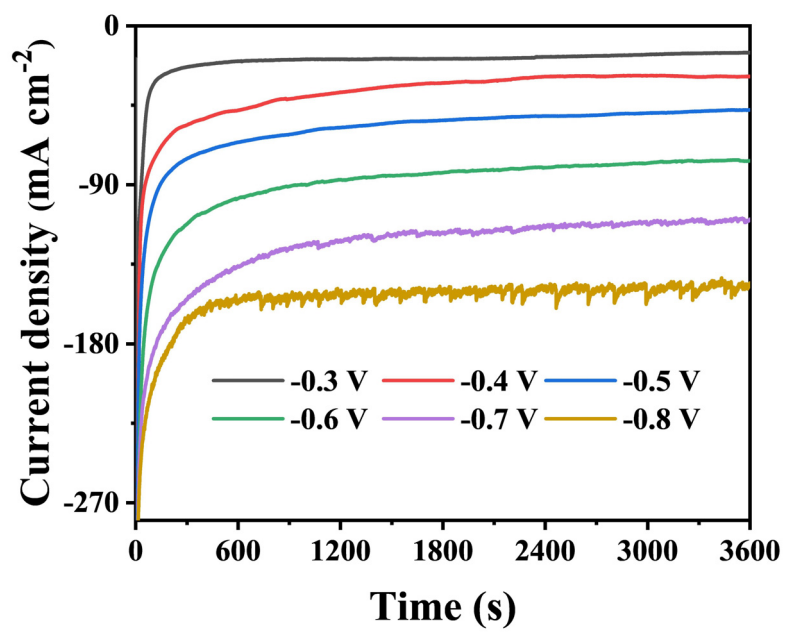

Fig. S6. Chronoamperometry curves of Cu<sub>1</sub>/Mo<sub>2</sub>C after 1 h electrolysis at various potentials.

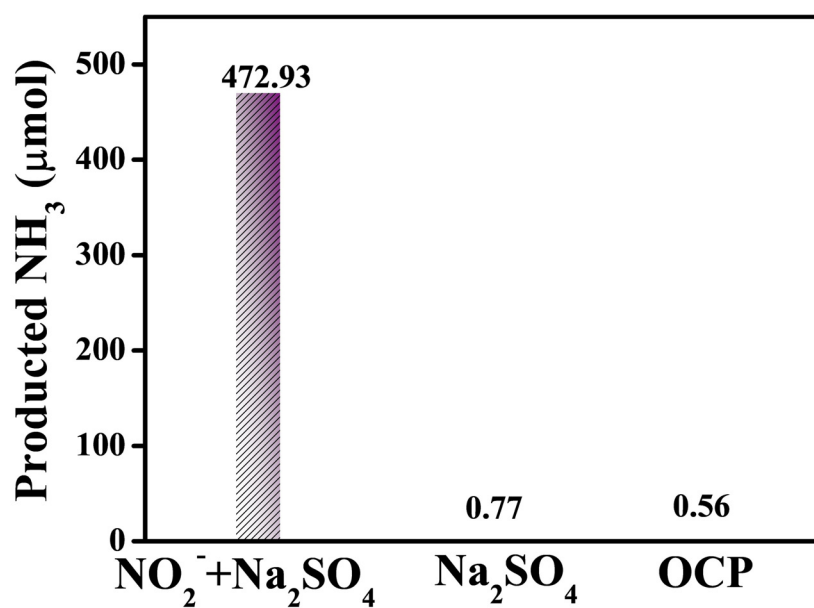

Fig. S7. Amounts of produced NH<sub>3</sub> on Cu<sub>1</sub>/Mo<sub>2</sub>C under different conditions: (1) electrolysis in NO<sub>2</sub><sup>-</sup>-containing solution at -0.6 V, (2) electrolysis in NO<sub>2</sub><sup>-</sup>-free solution at -0.6 V; (3) electrolysis in NO<sub>2</sub><sup>-</sup>-containing solution at open-circuit potential (OCP).

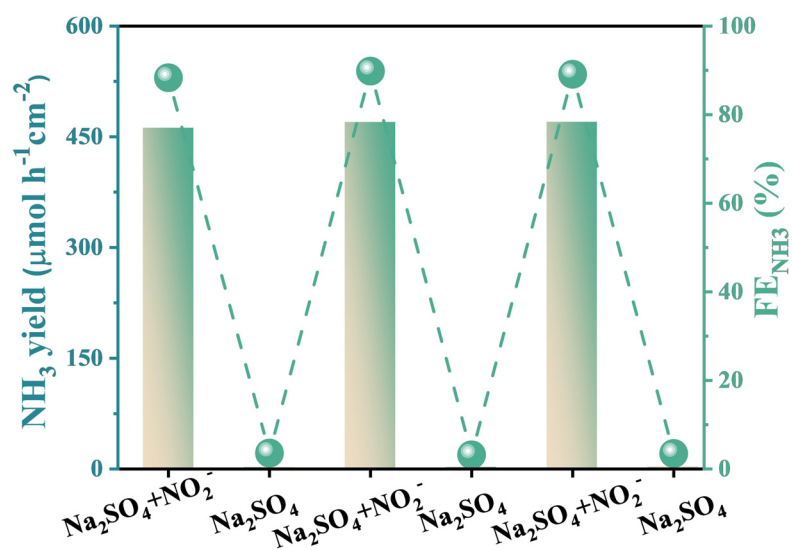

Fig. S8.  $\text{NH}_3$  yield rates and  $\text{FE}_{\text{NH}_3}$  during alternating cycle tests in 0.5 M  $\text{Na}_2\text{SO}_4$  solution with and without  $\text{NO}_2^-$  at  $-0.6$  V.

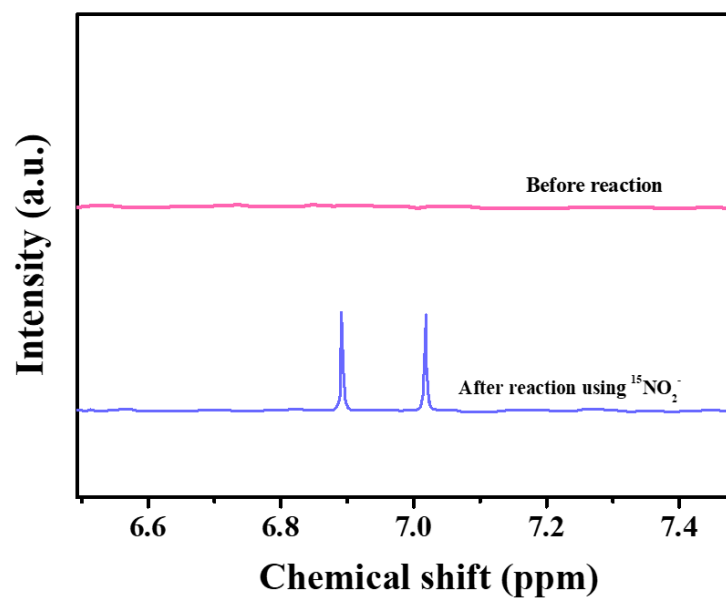

Fig. S9.  $^1\text{H}$  NMR spectra of the electrolyte after electrolysis on  $\text{Cu}_1/\text{Mo}_2\text{C}$  at  $-0.6$  V using  $^{15}\text{NO}_2^-$  as feeding agents.

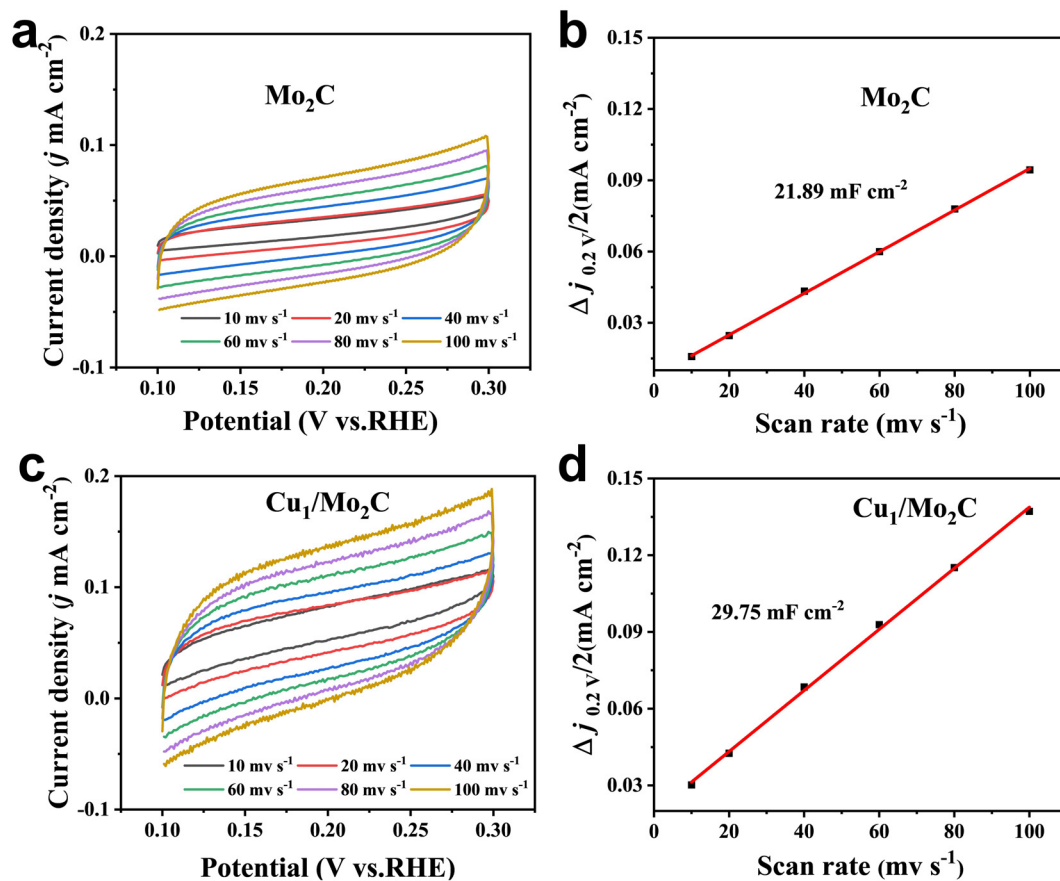

Fig. S10. Electrochemical double-layer capacitance ( $C_{dl}$ ) measurements at different scanning rates of 10~100  $\text{mV s}^{-1}$  for (a, b)  $\text{Mo}_2\text{C}$  and (c, d)  $\text{Cu}_1/\text{Mo}_2\text{C}$ .

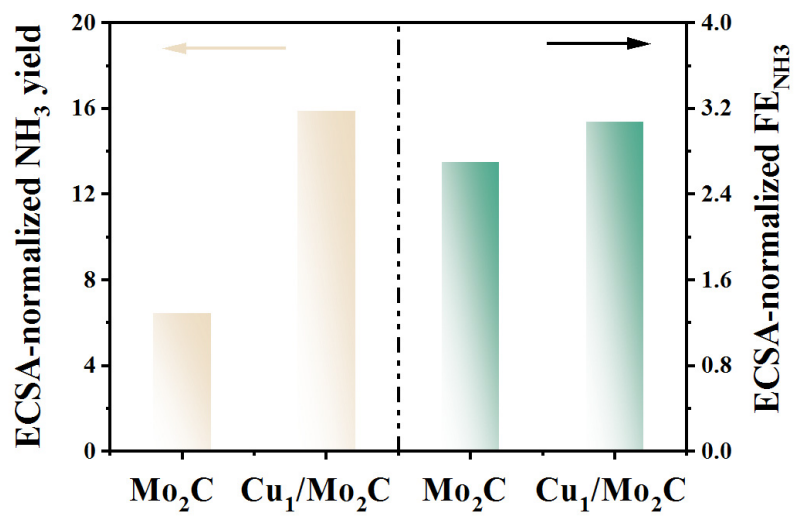

Fig. S11. Comparison of the ECSA-normalized NH<sub>3</sub> yield rates and FE<sub>NH3</sub> between Mo<sub>2</sub>C and Cu<sub>1</sub>/Mo<sub>2</sub>C at -0.6 V.



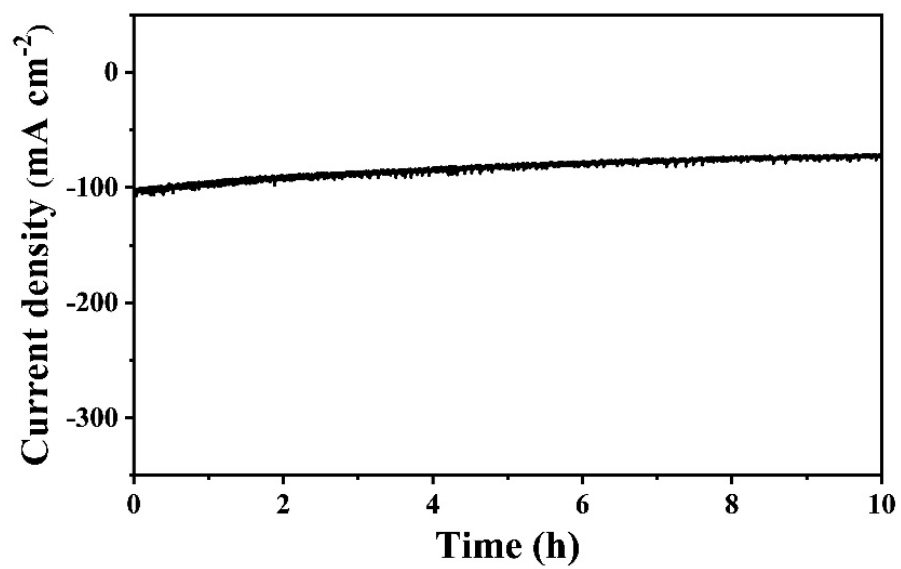

Fig. S12. Long-term durability test of Cu<sub>1</sub>/Mo<sub>2</sub>C during 10 h electrolysis at -0.6 V.

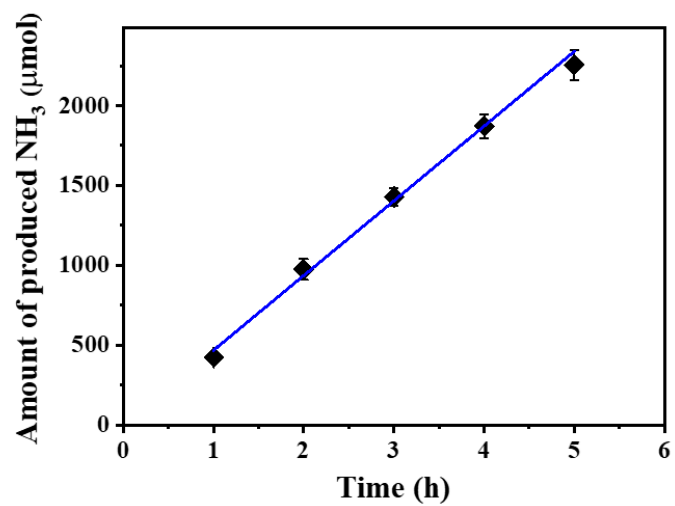

Fig. S13. Amount of produced NH<sub>3</sub> after NO<sub>2</sub>RR electrolysis at various times (1-6 h) on Cu<sub>1</sub>/Mo<sub>2</sub>C at -0.6 V.

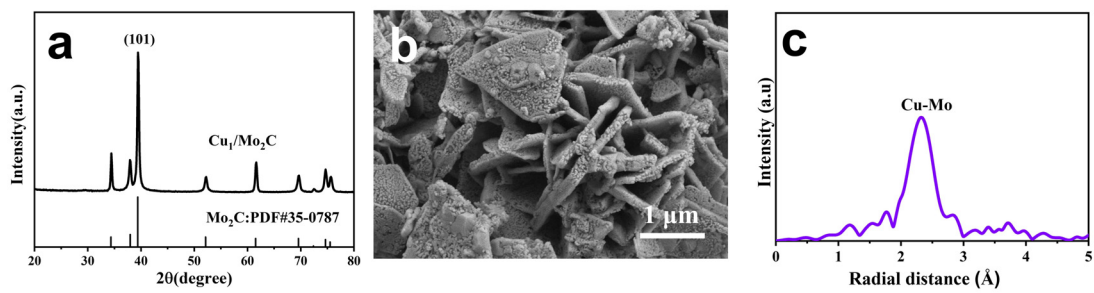

Fig. S14 (a) XRD pattern, (b) SEM image and (c) Cu K-edge EXAFS spectrum of Cu<sub>1</sub>/Mo<sub>2</sub>C after NO<sub>2</sub>RR test.

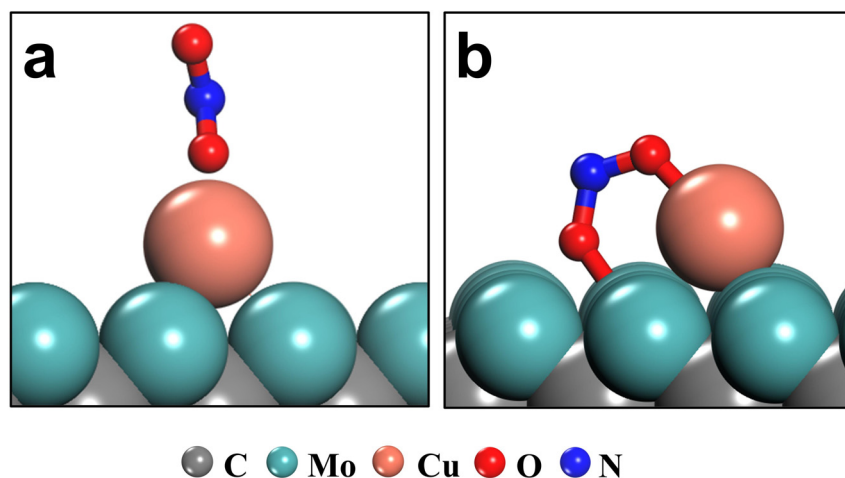

$$E_f = -1.27$$

$$E_f = -3.13$$

Fig. S15. Optimized structures of  $\text{NO}_2$  adsorption models on (a) Cu alone and (b) both Cu and its adjacent Mo atoms.

It is noted that we have examined the optimized adsorption models of  $^*\text{NO}_2$  on  $\text{Cu}_1/\text{Mo}_2\text{C}$ , and it is shown in Fig. S15 that  $^*\text{NO}_2$  adsorbed on both Cu atom and its adjacent Mo atoms has the lower adsorption energy compared to  $^*\text{NO}_2$  on Cu atom alone, indicating that Cu-Mo serves as the dual active centers to adsorb and activate the  $^*\text{NO}_2$ .

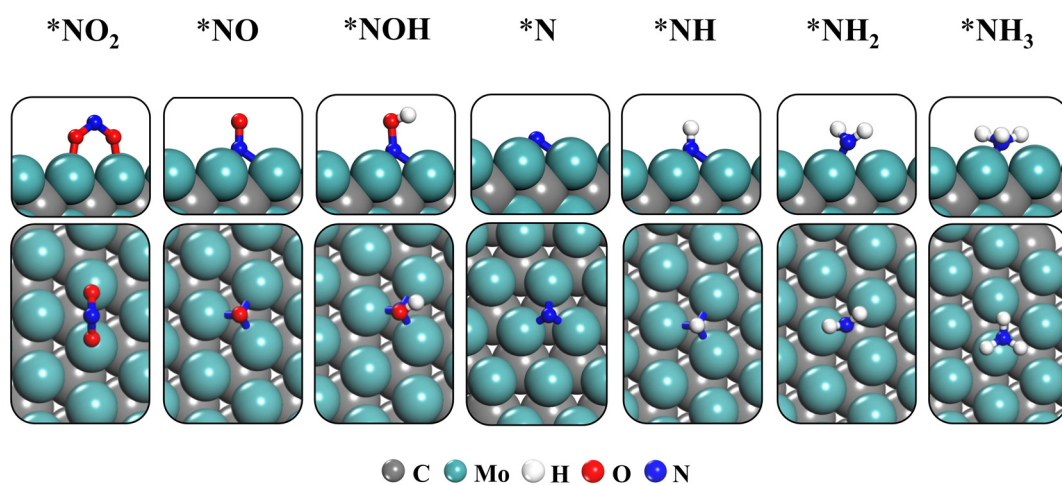

Fig. S16. Optimized structures of  $NO_2RR$  intermediates on bare  $Mo_2C$ .

Table S1. Cu K-edge EXAFS fitting results of Cu<sub>1</sub>/Mo<sub>2</sub>C

| Sample                             | Shell | CN  | R (Å) | $\sigma^2(10^{-3} \text{ Å}^2)$ | $\Delta E_0$ (eV) | R factor |
|------------------------------------|-------|-----|-------|---------------------------------|-------------------|----------|
| Cu <sub>1</sub> /Mo <sub>2</sub> C | Cu-Mo | 2.8 | 2.76  | 6.1                             | -3.7              | 0.007    |

CN is the coordination number, R is interatomic distance,  $\sigma^2$  is Debye-Waller factor,  $\Delta E_0$  is edge-energy shift, R factor is used to value the goodness of the fitting.

Table S2. Comparison of optimum NH<sub>3</sub> yield and Faradic efficiency (FE) for recently reported state-of-the-art NO<sub>2</sub>RR electrocatalysts at ambient conditions

| <i>Catalysts</i>                       | <i>Electrolytes</i>                                                              | <i>NH<sub>3</sub> yield<br/>(<math>\mu\text{mol h}^{-1}</math><br/><math>\text{cm}^{-2}</math>)</i> | <i>FE<sub>NH<sub>3</sub></sub>/%</i> | <i>Potential<br/>(V vs RHE)</i> | <i>Ref.</i>      |
|----------------------------------------|----------------------------------------------------------------------------------|-----------------------------------------------------------------------------------------------------|--------------------------------------|---------------------------------|------------------|
| P-TiO <sub>2</sub> /TP                 | 0.1 M Na <sub>2</sub> SO <sub>4</sub> (0.1 M NO <sub>2</sub> <sup>-</sup> )      | 560.8                                                                                               | 90.6                                 | -0.6 V                          | [5]              |
| CoP NA/TM                              | 0.1 M PBS (500 ppm NO <sub>2</sub> <sup>-</sup> )                                | 132.7±3.0                                                                                           | 90.0±2.3                             | -0.2 V                          | [6]              |
| ITO@TiO <sub>2</sub> /TP               | 0.5 M LiClO <sub>4</sub> (0.1 M NO <sub>2</sub> <sup>-</sup> )                   | 411.3                                                                                               | 82.6                                 | -0.5 V                          | [7]              |
| Pd/CuO NOs                             | 0.1 M K <sub>2</sub> SO <sub>4</sub> (0.01 M NO <sub>2</sub> <sup>-</sup> )      | 53.3                                                                                                | 91.8                                 | -1.5 V                          | [8]              |
| Ni <sub>2</sub> P/NF                   | 0.1 M PBS (200 ppm NO <sub>2</sub> <sup>-</sup> )                                | 158.1 ± 5.4                                                                                         | 90.2±3.0                             | -0.3 V                          | [9]              |
| CF@Cu <sub>2</sub> O                   | 0.1 M PBS (0.1 M NO <sub>2</sub> <sup>-</sup> )                                  | 441.8                                                                                               | 94.2                                 | -0.6 V                          | [10]             |
| MoS <sub>2</sub> NSs                   | 0.5 M Na <sub>2</sub> SO <sub>4</sub> (0.1 M NO <sub>2</sub> <sup>-</sup> )      | 528.8                                                                                               | 93.52                                | -0.5 V                          | [11]             |
| Ni-TiO <sub>2</sub> /TP                | 0.1 M NaOH (0.1 M NO <sub>2</sub> <sup>-</sup> )                                 | 380.27                                                                                              | 94.89                                | -0.5 V                          | [12]             |
| NiS <sub>2</sub> @TiO <sub>2</sub> /TM | 0.1 M NaOH (0.1 M NO <sub>2</sub> <sup>-</sup> )                                 | 485.4                                                                                               | 92.1                                 | -0.5 V                          | [13]             |
| MoO <sub>2</sub> /MP-12                | 0.5 M Na <sub>2</sub> SO <sub>4</sub> (0.1 M NO <sub>2</sub> <sup>-</sup> )      | 510.5                                                                                               | 94.5±0.2                             | -0.8 V                          | [14]             |
| Cu <sub>3</sub> P NA/CF                | 0.1 M PBS (0.1 M NO <sub>2</sub> <sup>-</sup> )                                  | 95.7±2.1                                                                                            | 91.2±2.5                             | -0.5 V                          | [15]             |
| CoB@TiO <sub>2</sub> /TP               | 0.1 M Na <sub>2</sub> SO <sub>4</sub> (400 ppm<br>NO <sub>2</sub> <sup>-</sup> ) | 233.1                                                                                               | 95.2                                 | -0.7 V                          | [16]             |
| Ag@NiO/CC                              | 0.1 M NaOH (0.1 M NO <sub>2</sub> <sup>-</sup> )                                 | 235.4                                                                                               | 97.7                                 | -0.4 V                          | [17]             |
| <b>Cu<sub>1</sub>/Mo<sub>2</sub>C</b>  | <b>0.5 M NaOH (0.1 M NO<sub>2</sub><sup>-</sup>)</b>                             | <b>472.9</b>                                                                                        | <b>91.5</b>                          | <b>-0.6 V</b>                   | <b>This work</b> |

## Supplementary references

- [1]. D. Zhu, L. Zhang, R. E. Ruther and R. J. Hamers, *Nat. Mater.*, 2013, **12**, 836-841.
- [2]. G. W. Watt and J. D. Chrisp, *Anal. Chem.*, 1952, **24**, 2006-2008.
- [3]. S.-H. Joo, J. W. Bae, W.-Y. Park, Y. Shimada, T. Wada, H. S. Kim, A. Takeuchi, T. J. Konno, H. Kato and I. V. Okulov, *Adv. Mater.*, 2020, **32**, 1906160.
- [4]. A. A. Peterson, F. Abild-Pedersen, F. Studt, J. Rossmeisl and J. K. Nørskov, *Energy Environ. Sci.*, 2010, **3**, 1311-1315.
- [5]. L. Ouyang, X. He, S. Sun, Y. Luo, D. Zheng, J. Chen, Y. Li, Y. Lin, Q. Liu and A. M. Asiri, *J. Mater. Chem. A*, 2022, **10**, 23494-23498.
- [6]. G. Wen, J. Liang, Q. Liu, T. Li, X. An, F. Zhang, A. A. Alshehri, K. A. Alzahrani, Y. Luo, Q. Kong and X. Sun, *Nano Res.*, 2022, **15**, 972-977.
- [7]. S. Li, J. Liang, P. Wei, Q. Liu, L. Xie, Y. Luo and X. Sun, *EScience*, 2022, **2**, 382-388.
- [8]. S. Liu, L. Cui, S. Yin, H. Ren, Z. Wang, Y. Xu, X. Li, L. Wang and H. Wang, *Appl. Catal. B*, 2022, **319**, 121876.
- [9]. G. Wen, J. Liang, L. Zhang, T. Li, Q. Liu, X. An, X. Shi, Y. Liu, S. Gao, A. M. Asiri, Y. Luo, Q. Kong and X. Sun, *J. Colloid Interf. Sci.*, 2022, **606**, 1055-1063.
- [10]. Q. Chen, X. An, Q. Liu, X. Wu, L. Xie, J. Zhang, W. Yao, M. S. Hamdy, Q. Kong and X. Sun, *Chem. Commun.*, 2022, **58**, 517-520.
- [11]. L. Yi, P. Shao, H. Li, M. Zhang, X. Peng, K. Chen, X. Liu and Z. Wen, *J. Power Sources*, 2023, **559**, 232668.
- [12]. Z. Cai, C. Ma, D. Zhao, X. Fan, R. Li, L. Zhang, J. Li, X. He, Y. Luo, D. Zheng, Y. Wang, B. Ying, S. Sun, J. Xu, Q. Lu and X. Sun, *Mater. Today Energy*, 2023, **31**, 101220.
- [13]. X. He, L. Hu, L. Xie, Z. Li, J. Chen, X. Li, J. Li, L. Zhang, X. Fang, D. Zheng, S. Sun, J. Zhang, A. Ali Alshehri, Y. Luo, Q. Liu, Y. Wang and X. Sun, *J. Colloid Interf. Sci.*, 2023, **634**, 86-92.
- [14]. G. Wang, Q. Chen, X. An, Q. Liu, L. Xie, J. Zhang, W. Yao, X. Liu, S. Sun, X. Sun and Q. Kong, *Colloid. Surface. A*, 2023, **657**, 130549.
- [15]. J. Liang, B. Deng, Q. Liu, G. Wen, Q. Liu, T. Li, Y. Luo, A. A. Alshehri, K. A. Alzahrani and D. Ma, *Green Chem.*, 2021, **23**, 5487-5493.
- [16]. L. Hu, D. Zhao, C. Liu, Y. Liang, D. Zheng, S. Sun, Q. Li, Q. Liu, Y. Luo, Y. Liao, L. Xie and X. Sun, *Inorg. Chem. Front.*, 2022, **9**, 6075-6079.
- [17]. Q. Liu, G. Wen, D. Zhao, L. Xie, S. Sun, L. Zhang, Y. Luo, A. A. Alshehri, M. S. Hamdy, Q. Kong and X. Sun, *J. Colloid Interf. Sci.*, 2022, **623**, 513-519.
